# Supplementary material for: 3D Printing Technology Based on Versatile Gelatin-Carrageenan Gel System for Drug Formulations
Source: MDPI journal article supplement (doi:10.3390/pharmaceutics15041218), 2023-04-11
Supplement: s1 [file s1]

**Table S1.** Texture characteristics test results for different gel inks.

| <b>Gel ink</b> | <b>Hardness(gf)</b> | <b>Chewiness(gf)</b> | <b>Gumminess(gf)</b> | <b>Springiness</b> | <b>Cohesiveness</b> |
|----------------|---------------------|----------------------|----------------------|--------------------|---------------------|
| F1             | 0.8498              | 0.8210               | 0.8383               | 0.9793             | 0.9865              |
| F2             | 1.5250              | 1.4459               | 1.5061               | 0.9600             | 0.9876              |
| F3             | 2.4639              | 1.9786               | 2.3416               | 0.8451             | 0.9505              |
| F5             | 2.0155              | 1.9322               | 1.9727               | 0.9794             | 0.9787              |
| F6             | 2.0923              | 1.6881               | 1.7197               | 0.9820             | 0.9481              |
| F7             | 1.5237              | 1.4321               | 1.5001               | 0.9548             | 0.9845              |
